# Supplementary material for: Synthesis of europium-doped VSOP, customized enhancer solution and improved microscopy fluorescence methodology for unambiguous histological detection
Source: PubMed Central journal article supplement (PMC5634840; doi:10.1186/s12951-017-0301-6), 2017-10-10
Supplement: 12951_2017_301_MOESM2_ESM.pdf [file 12951_2017_301_MOESM2_ESM.pdf]

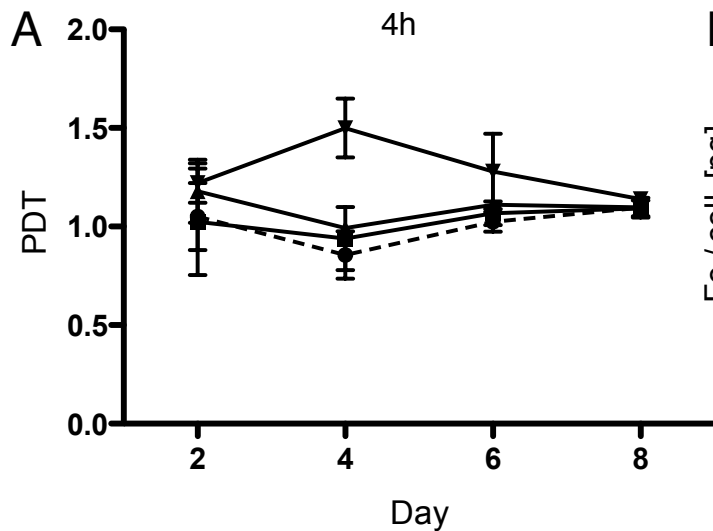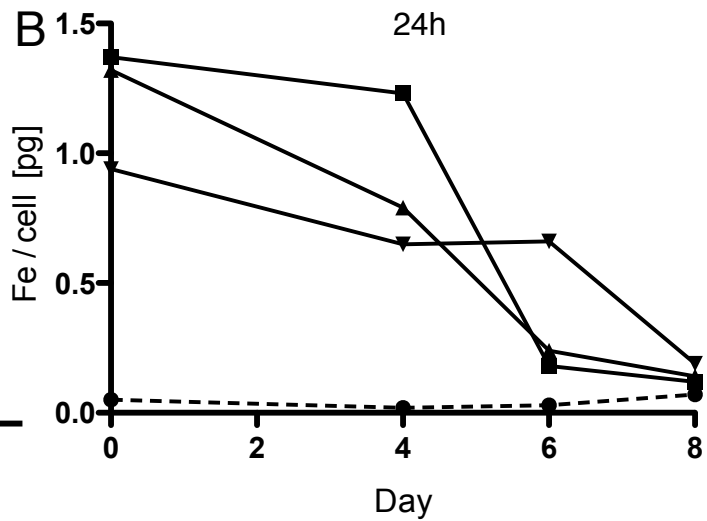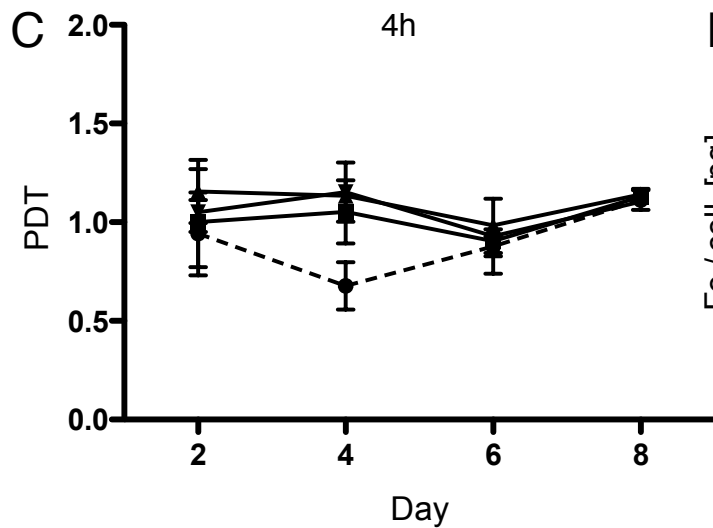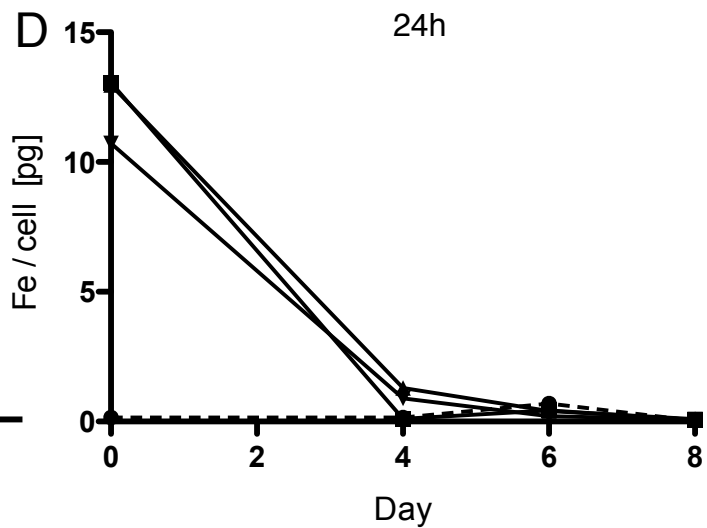

Non labeled    
  VSOP    
  Eu-VSOP-3    
  Eu-VSOP-7
